# Supplementary material
Source: PubMed Central journal article supplement (PMC5598757)

Supplementary Figure 1

**A**

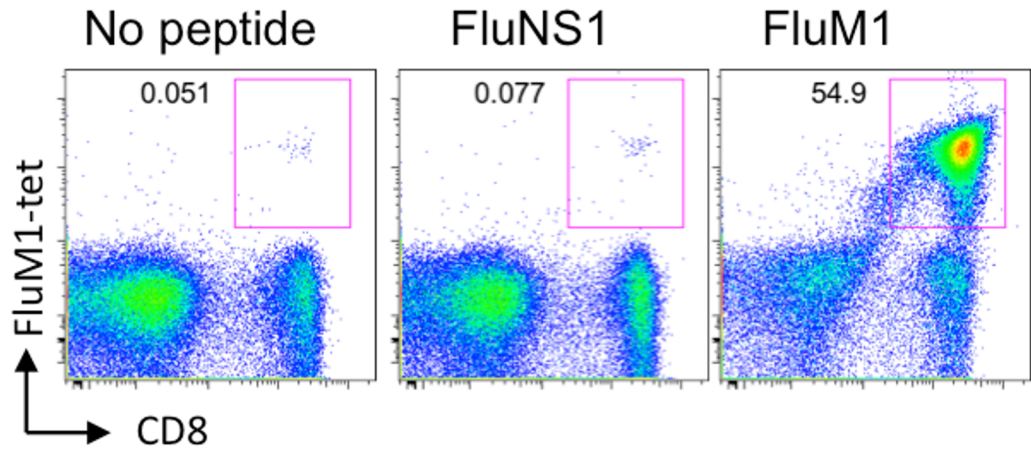

**B**

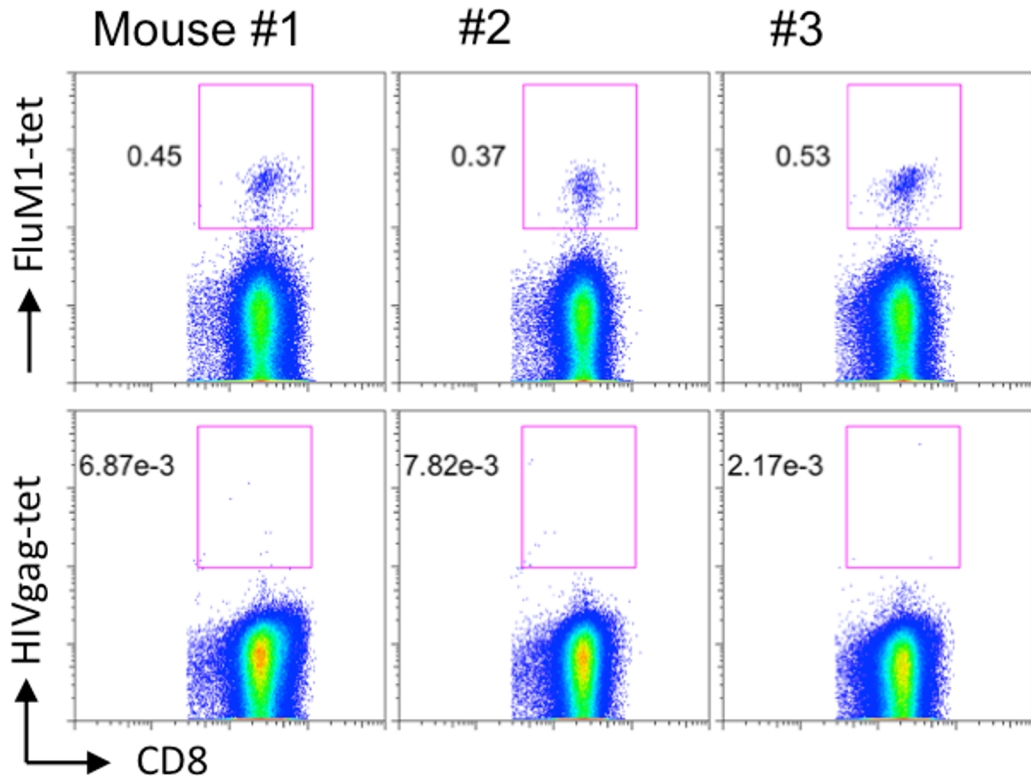

# Supplementary Figure 2

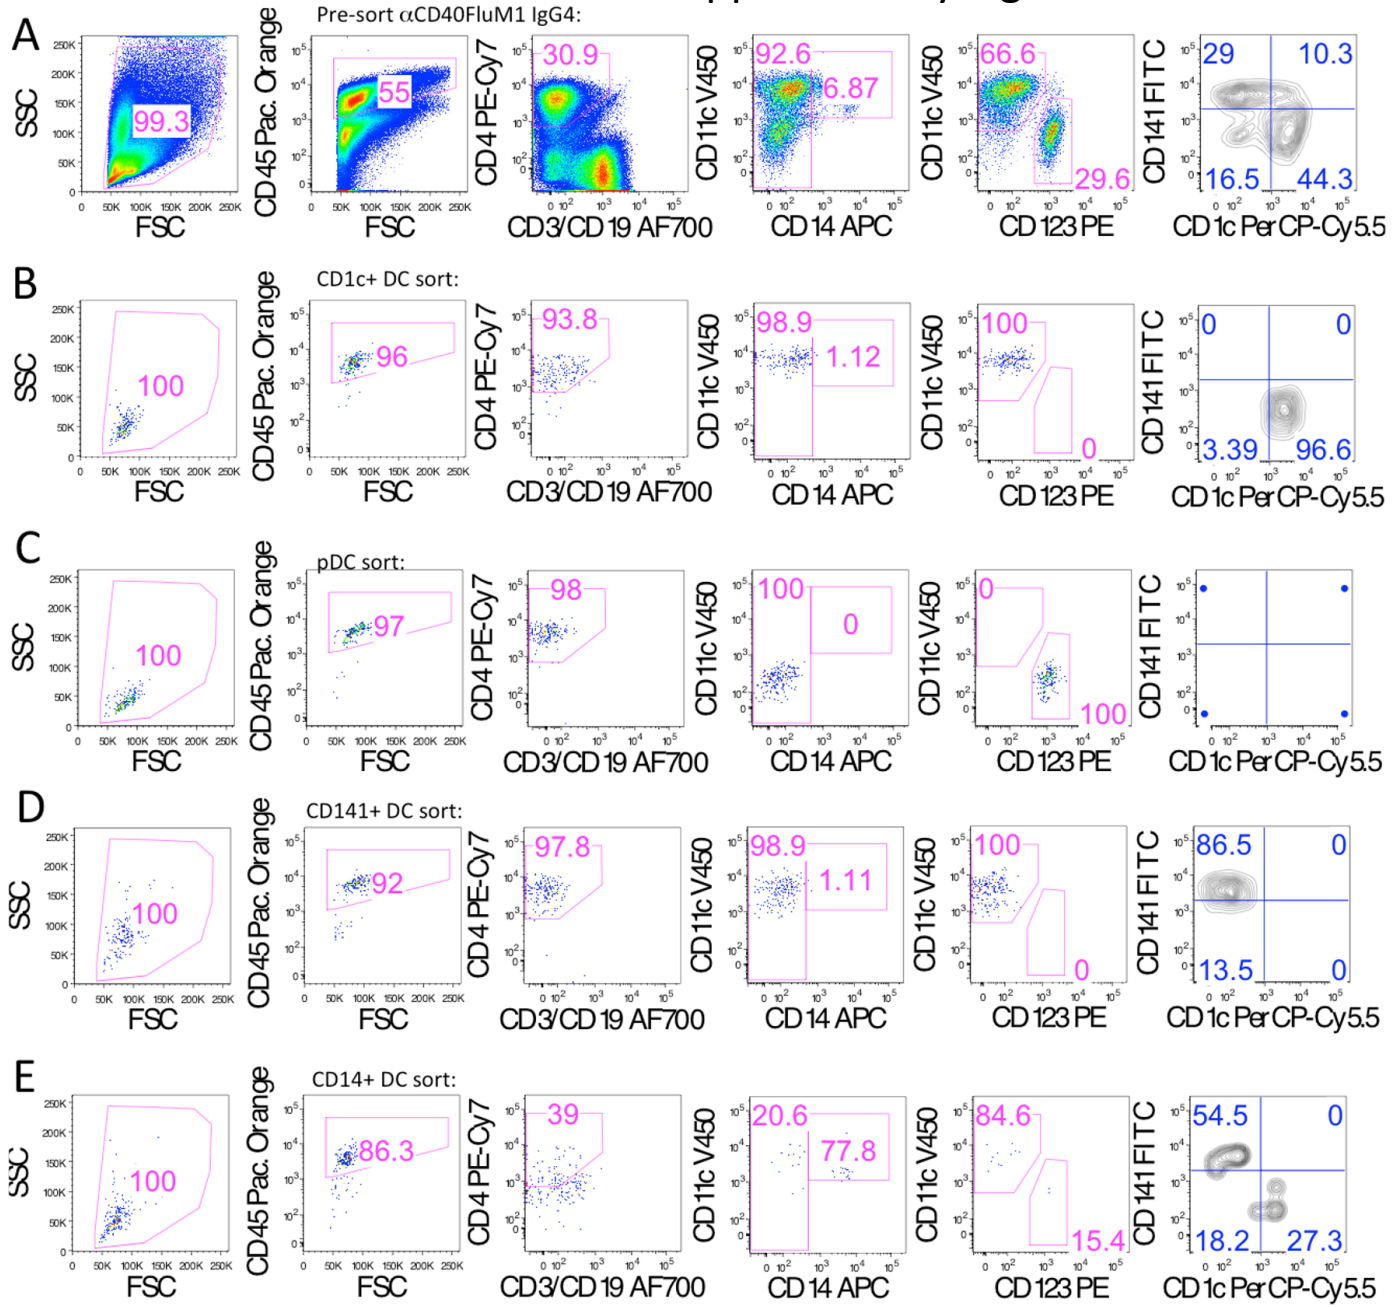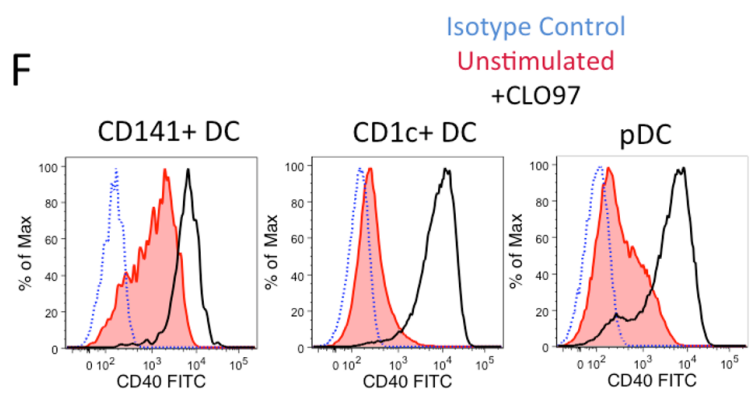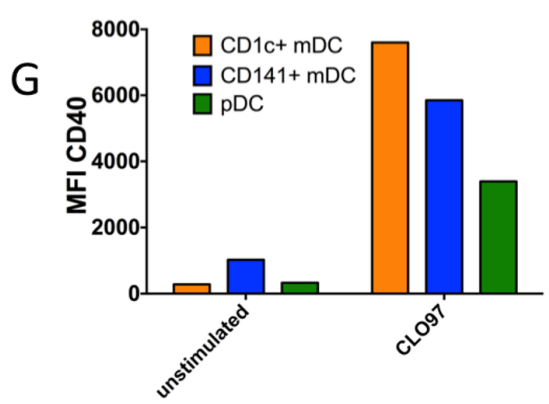

Supplement: NIHMS853275-supplement-supplement_1.pdf [file NIHMS853275-supplement-supplement_1.pdf]
